# Supplementary material for: Progression of diabetes, heart disease, and stroke multimorbidity in middle-aged women: A 20-year cohort study
Source: PubMed Central journal article supplement (PMC5849280; doi:10.1371/journal.pmed.1002516), 2018-03-13
Supplement: pmed.1002516.s002.pdf [file pmed.1002516.s002.pdf]

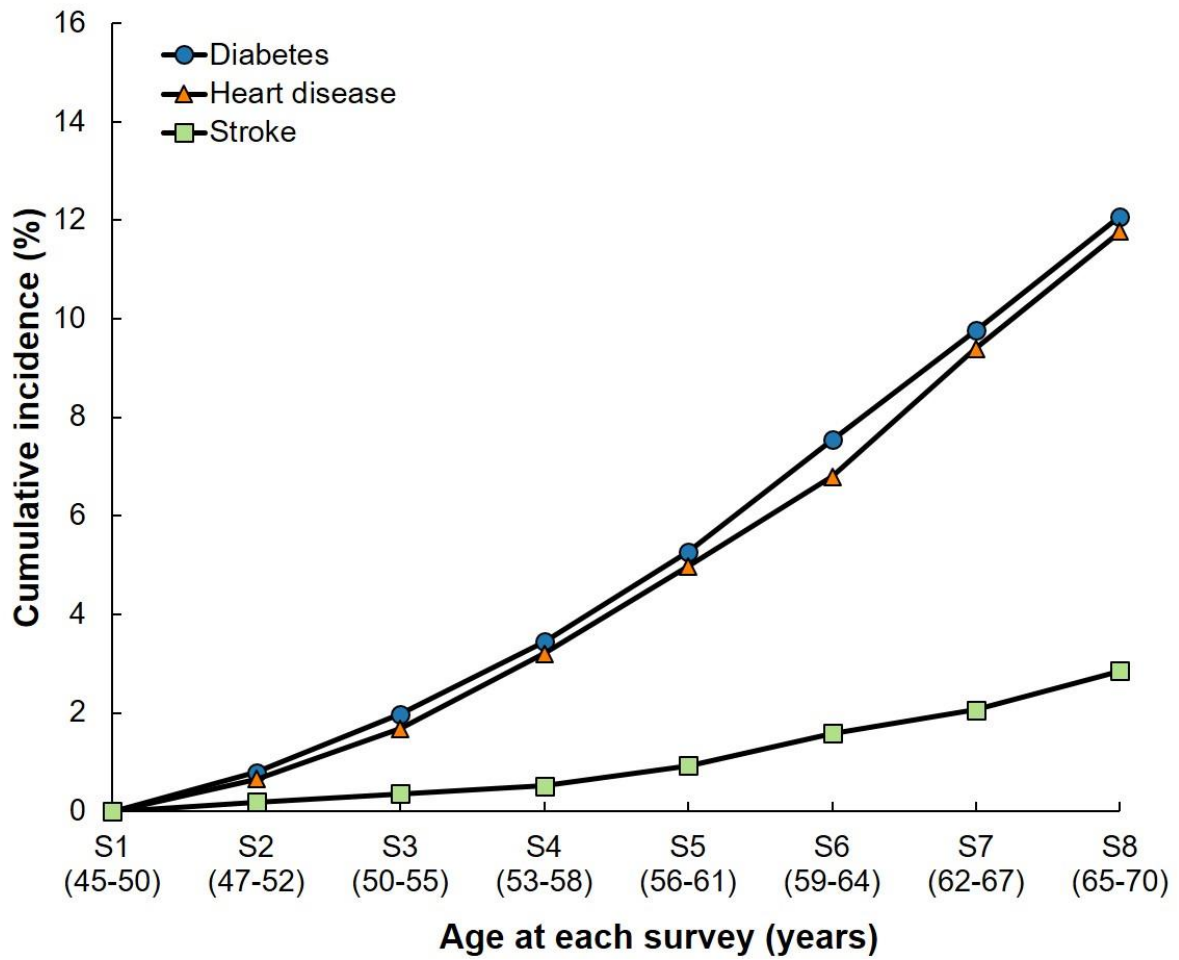

**S1 Fig. Cumulative incidence of diabetes, heart disease and stroke in middle-aged Australian women in complete cases (N=6718).**
