# Supplementary material for: Progression of diabetes, heart disease, and stroke multimorbidity in middle-aged women: A 20-year cohort study
Source: PubMed Central journal article supplement (PMC5849280; doi:10.1371/journal.pmed.1002516), 2018-03-13
Supplement: pmed.1002516.s003.pdf [file pmed.1002516.s003.pdf]

**S1 Table. Retention rates of included participants during follow-up.**

|                              | <b>Survey 1</b> | <b>Survey 2</b> | <b>Survey 3</b> | <b>Survey 4</b> | <b>Survey 5</b> | <b>Survey 6</b> | <b>Survey 7</b> | <b>Survey 8</b> |
|------------------------------|-----------------|-----------------|-----------------|-----------------|-----------------|-----------------|-----------------|-----------------|
| Year                         | 1996            | 1998            | 2001            | 2004            | 2007            | 2010            | 2013            | 2016            |
| Age                          | 45-50           | 47-52           | 50-55           | 53-58           | 56-61           | 59-64           | 62-67           | 65-70           |
| Deceased <sup>a</sup>        | 0               | -               | 76              | 150             | 241             | 352             | 474             | 553             |
| Non-respondents              | 0               | 456             | 1353            | 1540            | 1685            | 2086            | 2742            | 3164            |
| Respondents (%) <sup>b</sup> | 11941           | 11485<br>(96.2) | 10512<br>(88.0) | 10251<br>(85.8) | 10015<br>(83.9) | 9503<br>(79.6)  | 8725<br>(73.1)  | 8224<br>(68.9)  |

<sup>a</sup> Numbers for deceased are cumulative over surveys.

<sup>b</sup> %, Percentage of respondents at each survey who provided data on at least two consecutive surveys.
