# Supplementary material for: Progression of diabetes, heart disease, and stroke multimorbidity in middle-aged women: A 20-year cohort study
Source: PubMed Central journal article supplement (PMC5849280; doi:10.1371/journal.pmed.1002516), 2018-03-13
Supplement: pmed.1002516.s004.pdf [file pmed.1002516.s004.pdf]

**S2 Table. Proportions of women with each combination of diabetes, heart disease and stroke at each survey in middle-aged Australian women (1996-2016).**

| <b>Cardiometabolic outcome <sup>a</sup></b> | <b>Survey 1<br/>(n=11941)</b> | <b>Survey 2<br/>(n=11485)</b> | <b>Survey 3<br/>(n=10512)</b> | <b>Survey 4<br/>(n=10251)</b> | <b>Survey 5<br/>(n=10015)</b> | <b>Survey 6<br/>(n=9503)</b> | <b>Survey 7<br/>(n=8725)</b> | <b>Survey 8<br/>(n=8224)</b> |
|---------------------------------------------|-------------------------------|-------------------------------|-------------------------------|-------------------------------|-------------------------------|------------------------------|------------------------------|------------------------------|
| None                                        | 11941 (100)                   | 11242<br>(97.88)              | 10034<br>(95.37)              | 9466<br>(92.34)               | 8871<br>(88.58)               | 8066<br>(84.88)              | 7059<br>(80.91)              | 6330<br>(76.97)              |
| DM                                          | -                             | 114 (0.99)                    | 231 (2.20)                    | 377 (3.68)                    | 533 (5.32)                    | 645 (6.79)                   | 704 (8.07)                   | 793 (9.64)                   |
| HD                                          | -                             | 84 (0.73)                     | 178 (1.69)                    | 295 (2.88)                    | 431 (4.30)                    | 508 (5.35)                   | 604 (6.92)                   | 690 (8.39)                   |
| ST                                          | -                             | 26 (0.23)                     | 30 (0.29)                     | 42 (0.41)                     | 47 (0.47)                     | 75 (0.79)                    | 79 (0.91)                    | 94 (1.14)                    |
| DM+HD                                       | -                             | 10 (0.09)                     | 19 (0.18)                     | 43 (0.42)                     | 72 (0.72)                     | 114 (1.20)                   | 162 (1.86)                   | 187 (2.27)                   |
| DM+ST                                       | -                             | 1 (0.01)                      | 4 (0.04)                      | 7 (0.07)                      | 11 (0.11)                     | 18 (0.19)                    | 19 (0.22)                    | 22 (0.27)                    |
| HD+ST                                       | -                             | 6 (0.05)                      | 13 (0.12)                     | 15 (0.15)                     | 25 (0.25)                     | 35 (0.37)                    | 52 (0.60)                    | 52 (0.63)                    |
| DM+HD+ST                                    | -                             | 2 (0.02)                      | 3 (0.03)                      | 6 (0.06)                      | 25 (0.25)                     | 42 (0.44)                    | 46 (0.53)                    | 56 (0.68)                    |

DM, diabetes; HD, heart disease; ST, stroke.
