# Supplementary material for: Progression of diabetes, heart disease, and stroke multimorbidity in middle-aged women: A 20-year cohort study
Source: PubMed Central journal article supplement (PMC5849280; doi:10.1371/journal.pmed.1002516), 2018-03-13
Supplement: pmed.1002516.s006.pdf [file pmed.1002516.s006.pdf]

**S4 Table. Multinomial logistic regression analysis of the associations of sociodemographic and lifestyle factors at baseline with different combinations of conditions during 20-year follow up (ORs and 95% CIs, N=11941).**

| Characteristics                              | Condition combinations |                   |                                 |                                 |
|----------------------------------------------|------------------------|-------------------|---------------------------------|---------------------------------|
|                                              | DM only                | CVD only          | DM followed by CVD <sup>b</sup> | CVD followed by DM <sup>b</sup> |
| <b>Age at baseline</b>                       | 1.07 (1.02, 1.13)      | 1.09 (1.04, 1.15) | 1.05 (0.95, 1.16)               | 1.17 (1.01, 1.35)               |
| <b>Marital status</b>                        |                        |                   |                                 |                                 |
| Married/de facto                             | Ref                    | Ref               | Ref                             | Ref                             |
| Separated/divorced/widowed                   | 0.85 (0.66, 1.08)      | 1.28 (1.05, 1.56) | 1.26 (0.84, 1.91)               | 1.61 (0.95, 2.71)               |
| Never married                                | 0.63 (0.37, 1.05)      | 0.87 (0.57, 1.32) | 0.95 (0.41, 2.21)               | 0.87 (0.26, 2.89)               |
| <b>Area of residence</b>                     |                        |                   |                                 |                                 |
| Major cities                                 | Ref                    | Ref               | Ref                             | Ref                             |
| Inner regions                                | 0.96 (0.80, 1.14)      | 1.11 (0.94, 1.30) | 1.17 (0.82, 1.68)               | 0.94 (0.57, 1.56)               |
| Outer regions                                | 0.94 (0.77, 1.16)      | 0.88 (0.72, 1.08) | 1.12 (0.74, 1.70)               | 0.96 (0.53, 1.73)               |
| Remote/Very remote                           | 0.94 (0.66, 1.34)      | 1.03 (0.74, 1.45) | 0.60 (0.24, 1.53)               | 1.50 (0.64, 3.51)               |
| <b>Education</b>                             |                        |                   |                                 |                                 |
| University/Higher degree                     | Ref                    | Ref               | Ref                             | Ref                             |
| Trade/apprenticeship/diploma                 | 1.09 (0.82, 1.45)      | 0.99 (0.78, 1.25) | 1.31 (0.73, 2.33)               | 1.42 (0.64, 3.18)               |
| High school certificate                      | 1.40 (1.06, 1.87)      | 0.91 (0.71, 1.18) | 1.38 (0.76, 2.50)               | 1.43 (0.62, 3.29)               |
| No qualifications                            | 1.41 (1.10, 1.81)      | 0.99 (0.80, 1.21) | 1.28 (0.76, 2.16)               | 1.28 (0.61, 2.68)               |
| <b>Country of birth</b>                      |                        |                   |                                 |                                 |
| Australia                                    | Ref                    | Ref               | Ref                             | Ref                             |
| Outside Australia                            | 1.20 (1.00, 1.43)      | 0.86 (0.72, 1.03) | 1.09 (0.75, 1.58)               | 1.42 (0.87, 2.32)               |
| <b>Ability to manage on income</b>           |                        |                   |                                 |                                 |
| Easy/not bad                                 | Ref                    | Ref               | Ref                             | Ref                             |
| Sometime difficult                           | 1.23 (1.03, 1.45)      | 1.09 (0.93, 1.28) | 1.45 (1.03, 2.06)               | 1.53 (0.92, 2.54)               |
| Impossible/difficult always                  | 1.41 (1.13, 1.75)      | 1.28 (1.04, 1.57) | 2.04 (1.36, 3.04)               | 2.61 (1.52, 4.49)               |
| <b>Body mass index</b>                       |                        |                   |                                 |                                 |
| Underweight (<18.5 kg/m <sup>2</sup> )       | 0.97 (0.42, 2.23)      | 1.47 (0.90, 2.40) | 1.11 (0.26, 4.64)               | -                               |
| Normal weight (18.5-24.9 kg/m <sup>2</sup> ) | Ref                    | Ref               | Ref                             | Ref                             |
| Overweight (25-29.9 kg/m <sup>2</sup> )      | 2.37 (1.95, 2.87)      | 1.10 (0.93, 1.30) | 1.85 (1.25, 2.73)               | 2.43 (1.38, 4.29)               |

|                                               |                   |                   |                   |                    |
|-----------------------------------------------|-------------------|-------------------|-------------------|--------------------|
| Obese ( $\geq 30$ kg/m <sup>2</sup> )         | 5.99 (4.94, 7.26) | 1.42 (1.17, 1.72) | 4.57 (3.13, 6.67) | 5.83 (3.36, 10.14) |
| <b>Hypertension</b>                           |                   |                   |                   |                    |
| No                                            | Ref               | Ref               | Ref               | Ref                |
| Yes                                           | 1.82 (1.47, 2.24) | 1.51 (1.22, 1.89) | 1.67 (1.10, 2.55) | 2.21 (1.31, 3.75)  |
| <b>Physical activity</b>                      |                   |                   |                   |                    |
| High ( $\geq 1200$ MET <sup>a</sup> min/week) | Ref               | Ref               | Ref               | Ref                |
| Moderate (600-1199 MET min/week)              | 1.15 (0.88, 1.51) | 1.42 (1.12, 1.8)  | 1.04 (0.65, 1.68) | 1.10 (0.52, 2.32)  |
| Low (40-599 MET min/week)                     | 1.45 (1.12, 1.86) | 1.52 (1.2, 1.91)  | 0.85 (0.53, 1.37) | 1.39 (0.69, 2.80)  |
| Nil/sedentary (0-39 MET min/week)             | 1.65 (1.28, 2.13) | 1.62 (1.28, 2.05) | 1.03 (0.65, 1.65) | 1.34 (0.66, 2.73)  |
| <b>Smoking status</b>                         |                   |                   |                   |                    |
| Never-smoker                                  | Ref               | Ref               | Ref               | Ref                |
| Ex-smoker                                     | 1.14 (0.97, 1.36) | 1.12 (0.95, 1.31) | 0.97 (0.68, 1.40) | 1.51 (0.91, 2.49)  |
| Current smoker                                | 1.25 (1.02, 1.55) | 1.31 (1.08, 1.59) | 1.84 (1.26, 2.67) | 2.70 (1.60, 4.56)  |
| <b>Other chronic conditions</b>               |                   |                   |                   |                    |
| No other condition                            | Ref               | Ref               | Ref               | Ref                |
| Depression/anxiety                            | 0.89 (0.70, 1.14) | 0.94 (0.76, 1.18) | 1.04 (0.67, 1.63) | 1.40 (0.81, 2.42)  |
| COPD                                          | 0.89 (0.66, 1.21) | 0.90 (0.68, 1.19) | 1.21 (0.70, 2.08) | 1.00 (0.49, 2.07)  |
| Asthma                                        | 1.04 (0.73, 1.50) | 1.27 (0.93, 1.73) | 1.19 (0.61, 2.31) | 1.61 (0.75, 3.46)  |
| Cancer                                        | 1.19 (0.91, 1.56) | 1.06 (0.82, 1.37) | 0.67 (0.37, 1.23) | 1.64 (0.89, 3.03)  |
| Arthritis                                     | 1.07 (0.90, 1.28) | 1.65 (1.41, 1.92) | 1.85 (1.35, 2.54) | 1.93 (1.25, 2.99)  |
| Osteoporosis                                  | 0.77 (0.40, 1.49) | 0.88 (0.50, 1.57) | 1.68 (0.70, 4.03) | 0.76 (0.17, 3.30)  |

The results (ORs and 95% CI) were estimated using different combinations of conditions during the 20-year follow up and associated with predictors at baseline, compared with women developed 0 condition. The model was adjusted for all predictors shown in the table.

<sup>a</sup> MET, metabolic equivalent.

<sup>b</sup> CVD followed by diabetes refers to women with heart disease or stroke who subsequently developed comorbid diabetes. Diabetes followed by CVD refers to women with diabetes who subsequently developed comorbid heart disease or stroke.
