# Supplementary material for: Progression of diabetes, heart disease, and stroke multimorbidity in middle-aged women: A 20-year cohort study
Source: PubMed Central journal article supplement (PMC5849280; doi:10.1371/journal.pmed.1002516), 2018-03-13
Supplement: pmed.1002516.s007.pdf [file pmed.1002516.s007.pdf]

**S5 Table. Associations of time-varying sociodemographic and lifestyle factors with 3-year incidence of one condition and accumulation of multimorbidity in complete cases (N=6718).**

| Characteristics                              | Number of new condition(s) |                       |
|----------------------------------------------|----------------------------|-----------------------|
|                                              | 1                          | $\geq 2$ <sup>a</sup> |
| <b>Age at baseline</b>                       | 1.07 (1.04, 1.11)          | 1.04 (0.96, 1.11)     |
| <b>Marital status</b>                        |                            |                       |
| Married/de facto                             | Ref                        | Ref                   |
| Separated/divorced/widowed                   | 0.89 (0.76, 1.04)          | 1.43 (1.05, 1.95)     |
| Never married                                | 0.95 (0.67, 1.34)          | 1.47 (0.74, 2.94)     |
| <b>Area of residence</b>                     |                            |                       |
| Major cities                                 | Ref                        | Ref                   |
| Inner regions                                | 1.05 (0.92, 1.19)          | 1.35 (0.99, 1.83)     |
| Outer regions                                | 0.98 (0.83, 1.16)          | 1.16 (0.80, 1.70)     |
| Remote/Very remote                           | 1.05 (0.78, 1.43)          | 1.15 (0.55, 2.42)     |
| <b>Education<sup>b</sup></b>                 |                            |                       |
| University/Higher degree                     | Ref                        | Ref                   |
| Trade/apprenticeship/diploma                 | 1.00 (0.82, 1.21)          | 1.29 (0.80, 2.07)     |
| High school certificate                      | 1.09 (0.88, 1.33)          | 1.23 (0.74, 2.04)     |
| No qualifications                            | 1.10 (0.92, 1.30)          | 1.33 (0.86, 2.05)     |
| <b>Country of birth<sup>b</sup></b>          |                            |                       |
| Australia                                    | Ref                        | Ref                   |
| Outside Australia                            | 0.99 (0.86, 1.15)          | 1.64 (1.22, 2.21)     |
| <b>Ability to manage on income</b>           |                            |                       |
| Easy/not bad                                 | Ref                        | Ref                   |
| Sometime difficult                           | 1.12 (0.98, 1.28)          | 0.93 (0.67, 1.29)     |
| Impossible/difficult always                  | 1.55 (1.31, 1.83)          | 1.73 (1.23, 2.45)     |
| <b>Body mass index</b>                       |                            |                       |
| Underweight (<18.5 kg/m <sup>2</sup> )       | 1.14 (0.62, 2.10)          | 0.67 (0.09, 4.92)     |
| Normal weight (18.5-24.9 kg/m <sup>2</sup> ) | Ref                        | Ref                   |
| Overweight (25-29.9 kg/m <sup>2</sup> )      | 1.43 (1.23, 1.67)          | 1.47 (0.98, 2.19)     |
| Obese ( $\geq 30$ kg/m <sup>2</sup> )        | 2.41 (2.07, 2.81)          | 3.37 (2.32, 4.89)     |
| <b>Hypertension</b>                          |                            |                       |
| No                                           | Ref                        | Ref                   |
| Yes                                          | 1.14 (1.02, 1.28)          | 2.35 (1.80, 3.06)     |
| <b>Physical activity</b>                     |                            |                       |
| High ( $\geq 1200$ MET min/week)             | Ref                        | Ref                   |
| Moderate (600-1199 MET min/week)             | 1.08 (0.92, 1.27)          | 0.71 (0.47, 1.10)     |
| Low (40-599 MET min/week)                    | 1.14 (0.98, 1.33)          | 1.19 (0.85, 1.67)     |
| Nil/sedentary (0-39 MET min/week)            | 1.17 (0.99, 1.39)          | 1.47 (1.02, 2.11)     |
| <b>Smoking status</b>                        |                            |                       |
| Never-smoker                                 | Ref                        | Ref                   |
| Ex-smoker                                    | 1.13 (1.00, 1.28)          | 1.22 (0.91, 1.63)     |
| Current smoker                               | 1.38 (1.14, 1.67)          | 1.86 (1.24, 2.79)     |
| <b>Other chronic conditions</b>              |                            |                       |
| Depression/anxiety                           | 1.33 (1.18, 1.50)          | 1.62 (1.26, 2.08)     |
| COPD                                         | 1.05 (0.90, 1.22)          | 1.05 (0.78, 1.41)     |
| Asthma                                       | 1.17 (1.01, 1.35)          | 1.33 (1.00, 1.76)     |

|              |                   |                   |
|--------------|-------------------|-------------------|
| Cancer       | 0.93 (0.77, 1.13) | 1.21 (0.86, 1.70) |
| Arthritis    | 1.22 (1.07, 1.40) | 1.37 (1.04, 1.80) |
| Osteoporosis | 0.99 (0.82, 1.21) | 1.43 (1.02, 2.01) |

The results (ORs and 95% CI) were estimated using cumulative incidence of multimorbidity (0, 1, or  $\geq 2$ ) at each survey regressed on time-varying covariates at the previous survey. The model was adjusted for all predictors shown in the table.

<sup>a</sup> indicates the transition from none or one to two or three, or from two to three conditions.

<sup>b</sup> not time varying.
